# Supplementary material for: Conventional methanotrophs are responsible for atmospheric methane oxidation in paddy soils
Source: PubMed Central journal article supplement (PMC4895445; doi:10.1038/ncomms11728), 2016-06-01
Supplement: ncomms11728-s1.pdf [file ncomms11728-s1.pdf]

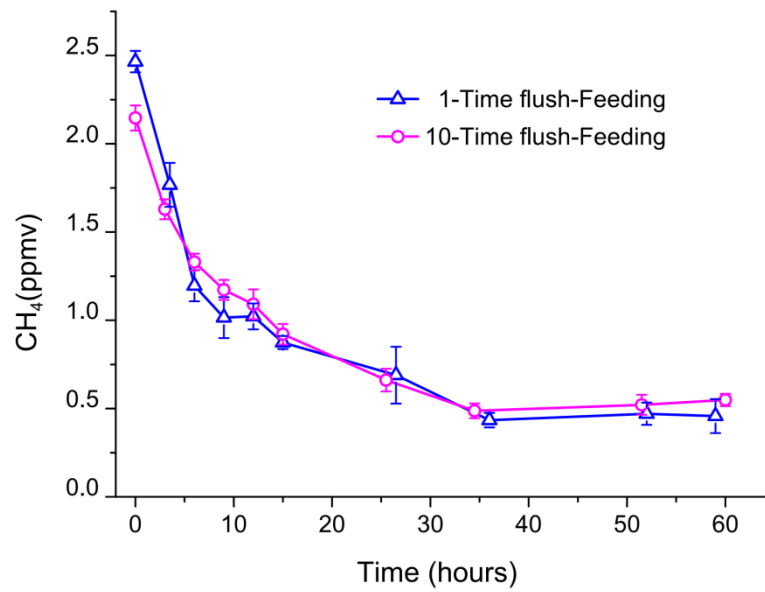

**Supplementary Figure 1. High-affinity methane oxidation (HAMO) dynamics of soils with added methane at 10000 ppmv for 1 time and 10 times.** After the complete consumption of 10000 ppmv methane, the measurement was conducted by renewing the headspace with ambient air. Error bars represent 2 s.d. of the measurements from the triplicate microcosms. No significant difference were found between these two curves ( $P > 0.05$ , paired samples t test).

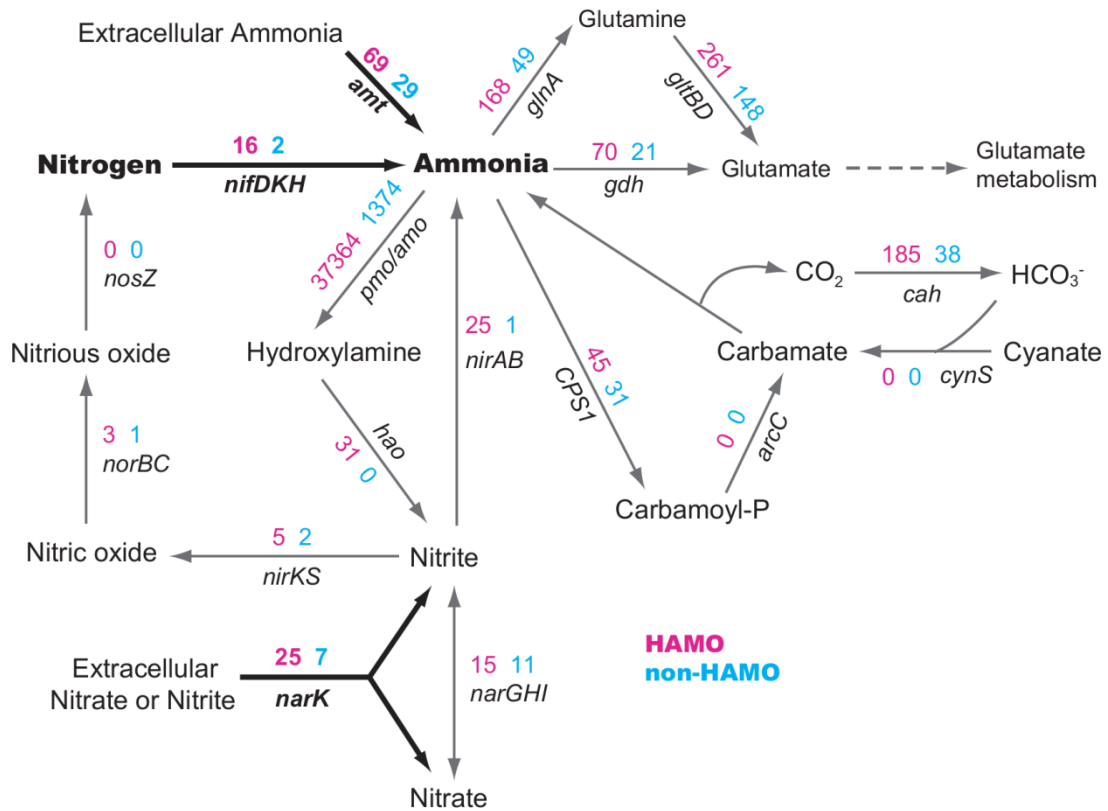

**Supplementary Figure 2. Reconstruction of the nitrogen metabolic pathway based on methanotrophic transcripts detected in paddy soils with and without HAMO activity.** The numbers in red and blue indicate the abundance of transcripts detected in the HAMO and non-HAMO transcriptomes, respectively. The gene transcript abundance was normalized as the reads number per million transcripts annotated within the Subsystem in MG-RAST. The enzymes or proteins encoded by these genes areas follows: *amt*, ammonium transporter; *arcC*, carbamate kinase; *cah*, carbonic anhydrase; *CPS1*, carbamoyl-phosphate synthase (ammonia); *cynS*, cyanate lyase; *gdh*, glutamate dehydrogenase; *glnA*, glutamine synthetase; *gltBD*, glutamate synthase (NADPH); *hao*, hydroxylamine dehydrogenase; *narGHI*, nitrate reductase; *narK*, nitrate/nitrite transporter; *nifDKH*, nitrogenase (molybdenum-iron); *nirAB*, ferredoxin---nitrite reductase and nitrite reductase (NADH); *nirKS*, nitrite reductase (NO-forming); *norBC*, nitric oxide reductase; *nosZ*, nitrous oxide reductase; *pmo/amo*, methane/ammonia monooxygenase. The uptake steps of extracellular nitrogen are indicated by the bold arrows.

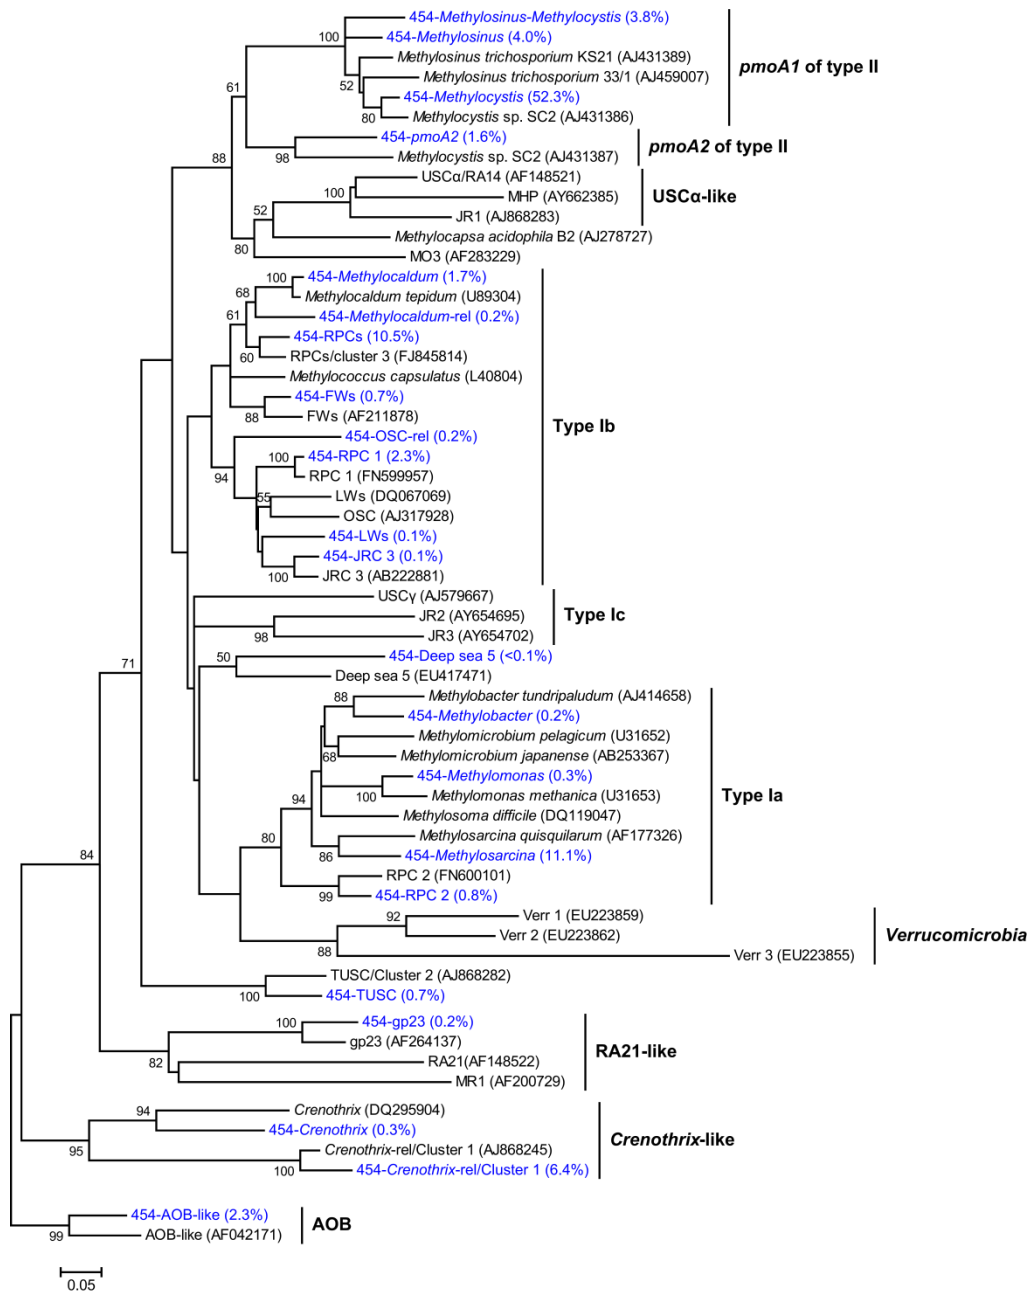

### Supplementary Figure 3. Phylogeny of the *pmoA* genes detected in the paddy soil.

The Neighbor-joining tree was constructed using the MEGA 4.0 software package based on 125 deduced amino acid sequences. Representatives of the lineages detected in the paddy soil samples (time zero, non-HAMO, 1-Time Flush-Feeding and 10-Time Flush-Feeding) by *pmoA* amplicon pyrosequencing are shown in blue. *PmoA*-like sequences affiliated with AOB (ammonia-oxidizing bacteria) were used as the outgroup. Only bootstrap values greater than 50% (1,000 replicates) are shown at the nodes. The scale bar represents 5% sequence divergence. The following abbreviations of lineages without cultured representatives are used: FW, freshwater sediment of Lake Wintergreen, Michigan, USA; JR, Jasper Ridge, California, USA; JRC, Japanese rice cluster; LW, sediment of Lake Washington, USA; MHP, Moor House peat, England; MR, forest near Marburg, Germany; RA, Rold Forest, Denmark; RPC, rice paddy cluster; TUSC, tropical upland soil cluster; USC, upland soil cluster.

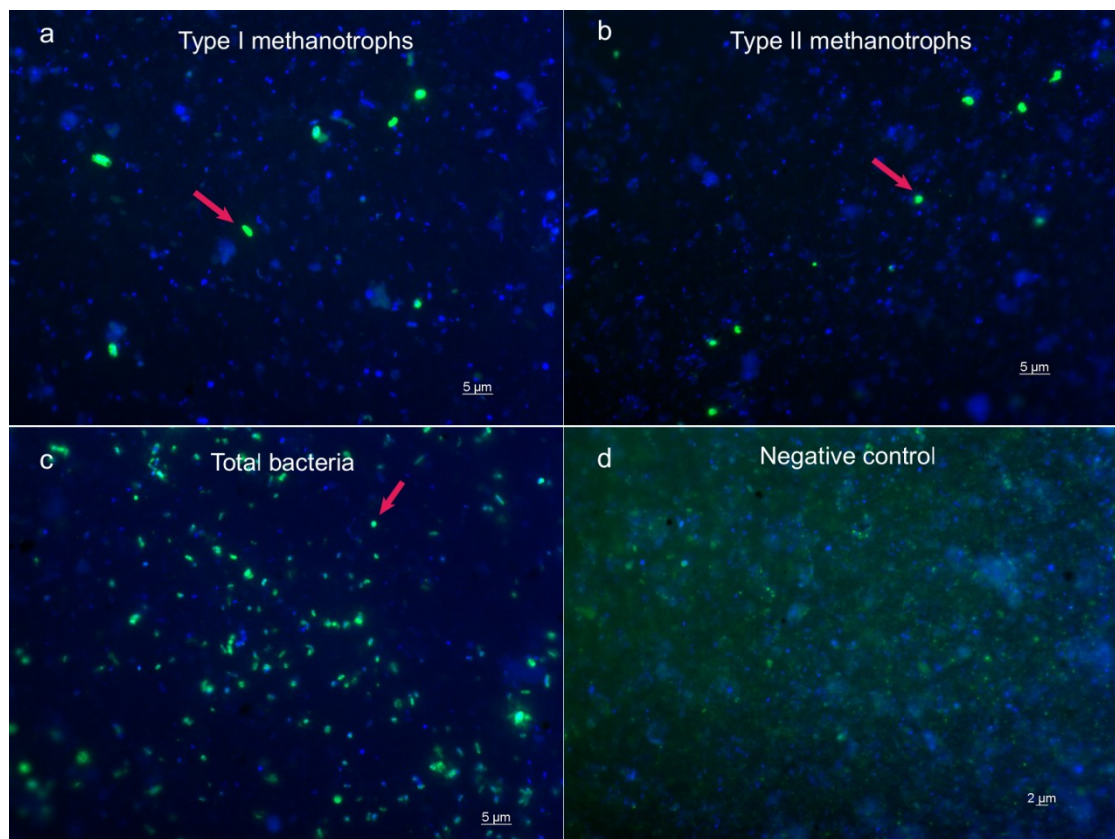

**Supplementary Figure 4. Photomicrographs of CARD-FISH (catalyzed reporter deposition-fluorescence in situ hybridization) and DAPI (4', 6-diamidino-2-phenylindole) stained cells.** Cells were derived from the 10-Time Flush-Feeding paddy soil and show high-affinity methane oxidation. CARD-FISH stained (green) type I methanotrophs (a), type II methanotrophs (b) and total bacteria (c) are shown using the group specific probes My669, M $\alpha$ 450 and EUB I-III, respectively. Negative control of CARD-FISH using a nonspecific binding probe NON338 (d). The DAPI stained cells are shown in all four panels in blue.

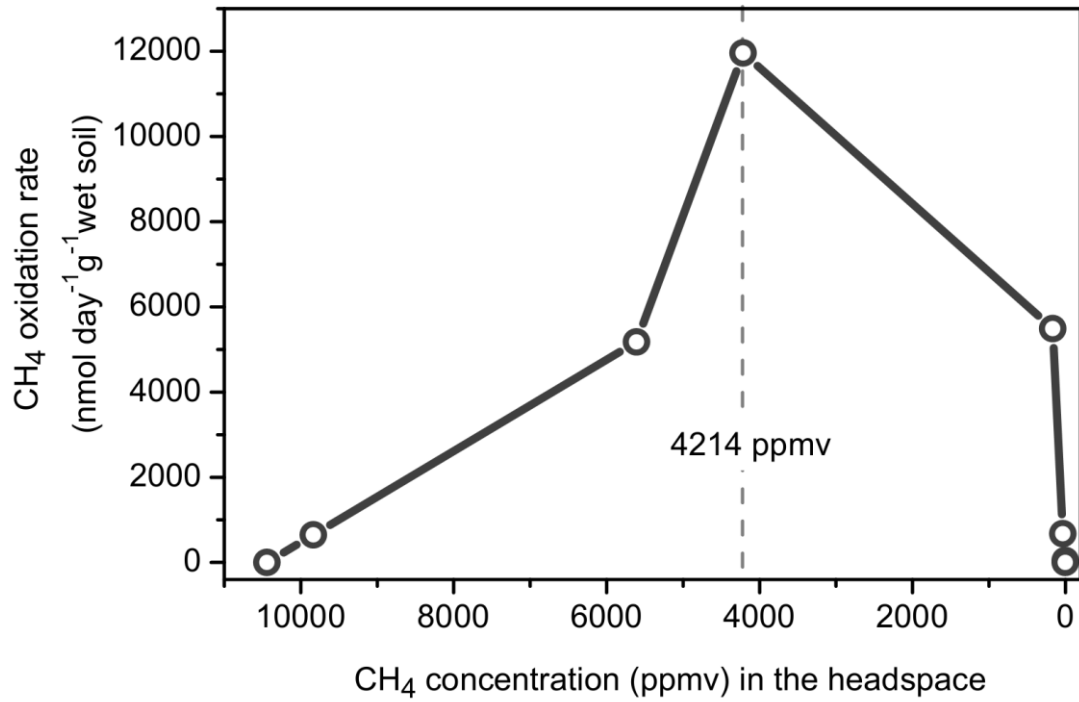

**Supplementary Figure 5. Change in the apparent methane oxidation rate versus the headspace methane concentration in soil microcosms amended with 10000 ppmv methane.** The apparent rate of soil methane oxidation was calculated using the following equation: the methane oxidation rate = the amount of methane consumed for each gram of soil divided by time between the two neighboring measurement points. The simulated highest rate of methane oxidation was indicated by the vertical dashed line.

**Supplementary Table 1. Summary of HAMO (high-affinity methane oxidation) and non-HAMO metatranscriptomes**

|                                                         | HAMO       | Non-HAMO   |
|---------------------------------------------------------|------------|------------|
| Raw sequences (paired)                                  | 28,553,977 | 36,444,367 |
| Sequence length of raw sequences (bp)                   | 101        | 101        |
| Submitted sequences (pair merged)                       | 22,480,376 | 30,507,648 |
| Artificial duplicate sequences                          | 10,487,831 | 15,797,270 |
| Sequences passed quality control                        | 11,992,545 | 14,710,378 |
| Mean sequence length after quality control (bp)         | 161 ± 19   | 159 ± 18   |
| Predicted protein features                              | 9,638,854  | 11,697,063 |
| Sequences annotated by M5NR database <sup>a</sup>       | 4,854,771  | 5,337,521  |
| Sequences annotated by GenBank nr database <sup>b</sup> | 2,009,255  | 2,222,255  |
| Sequences assigned to Subsystems <sup>c</sup>           | 1,059,586  | 1,050,766  |

a, Cutoff setting of taxonomic classification using the 'Best Hit Classification' tool: Max. e-Value: 1e-5, Min. % Identity: 60, Min. Alignment Length: 30.

b, Cutoff setting of function gene annotation: Max. e-Value: 1e-5, Min. % Identity: 60, Min. Alignment Length: 30.

c, Cutoff setting of function gene category annotation using the 'Hierarchical Classification' tool: Max. e-Value: 1e-10, Min. % Identity: 60, Min. Alignment Length: 30.

**Supplementary Table 2. Taxonomic classification of *pmoA* transcripts**

| <i>pmoA</i> group or lineage based on BLAST and MEGAN <sup>a</sup> |                 |                                            | Reads abundance |          |
|--------------------------------------------------------------------|-----------------|--------------------------------------------|-----------------|----------|
|                                                                    |                 |                                            | HAMO            | Non-HAMO |
| Proposed atmospheric methane oxidizing groups                      |                 |                                            |                 |          |
| Type II                                                            | Type IIb        | <i>pmoA2</i>                               | 1 <sup>b</sup>  | –        |
|                                                                    |                 | USC $\alpha$                               | –               | –        |
| Type I                                                             | Type Ib         | USC $\gamma$                               | –               | –        |
| Non Atmospheric methane oxidizing groups                           |                 |                                            |                 |          |
| Type I                                                             | Type Ia         | <i>Methylobacter</i>                       | 244             | 5        |
|                                                                    |                 | <i>Methylomonas</i>                        | 4               | 1        |
|                                                                    |                 | <i>Methylosarcina</i>                      | 9638            | 93       |
|                                                                    |                 | <i>Methylomicrobium japonense</i>          | 341             | –        |
|                                                                    |                 | RPC–2                                      | 392             | 2        |
|                                                                    |                 | LP20                                       | 3               | –        |
|                                                                    |                 | Unclassified type Ia                       | 169             | –        |
|                                                                    | Type Ib         | FWs                                        | 107             | 4        |
|                                                                    |                 | LWs                                        | 1               | 1        |
|                                                                    |                 | <i>Methylocaldum</i>                       | 32              | 5        |
|                                                                    |                 | <i>Methylocaldum</i> –rel                  | 4               | –        |
|                                                                    |                 | <i>Methylothermus</i>                      | 125             | 3        |
|                                                                    |                 | RPC–1                                      | 52              | –        |
|                                                                    |                 | RPCs                                       | 383             | 16       |
|                                                                    |                 | Lake_cluster_2                             | 27              | –        |
|                                                                    |                 | Deep sea 5                                 | 13              | –        |
|                                                                    |                 | Unclassified type Ib                       | 58              | 1        |
|                                                                    | Type Ic         | JR3                                        | –               | 1        |
|                                                                    |                 | JR3-rel                                    | 1               | –        |
| Type II                                                            | Type IIa        | <i>Methylocystis</i>                       | 441             | 58       |
|                                                                    |                 | <i>Methylosinus</i>                        | 4               | 1        |
|                                                                    |                 | <i>Methylosinus</i> / <i>Methylocystis</i> | 2               | 1        |
|                                                                    |                 | Unclassified type IIa                      | 42              | 6        |
| <i>pxmA</i> –like                                                  | Crenothrix–like | Crenothrix                                 | 1               | 1        |
|                                                                    | M84-P105        | M84-P105                                   | 3               | –        |
| Total                                                              |                 |                                            | 12088           | 199      |

a, LCA Parameters used in MEGAN is Min Support: 1, Min Score: 150, Top Percent: 1.0, Win Score: 50.0.

b, Reads abundance was normalized as the reads number for each 2 million transcripts annotated by GenBank nr database.

– , not determined.

**Supplementary Table 3. Taxonomic classification of the *pmoA* gene sequences obtained by pyrosequencing**

| <i>pmoA</i> group or lineage based on BLAST and MEGAN <sup>a</sup> |                      |                                   | High-quality reads abundance |          |                        |                         |
|--------------------------------------------------------------------|----------------------|-----------------------------------|------------------------------|----------|------------------------|-------------------------|
|                                                                    |                      |                                   | Time zero                    | Non-HAMO | 1-TF <sup>b</sup> HAMO | 10-TF <sup>c</sup> HAMO |
| Proposed atmospheric methane oxidizers                             |                      |                                   |                              |          |                        |                         |
| Type II                                                            | Type IIb             | <i>pmoA2</i>                      | 41                           | 39       | 20                     | 19                      |
|                                                                    |                      | USC $\alpha$                      | –                            | –        | –                      | –                       |
| Type I                                                             | Type Ib              | USC $\gamma$                      | –                            | –        | –                      | –                       |
| Non-atmospheric methane oxidizers                                  |                      |                                   |                              |          |                        |                         |
| Type I                                                             | Type Ia              | <i>Methylobacter</i>              | 5                            | 1        | 2                      | 4                       |
|                                                                    |                      | <i>Methylomonas</i>               | 6                            | 6        | 11                     | 3                       |
|                                                                    |                      | <i>Methylosarcina</i>             | 7                            | 8        | 284                    | 543                     |
|                                                                    |                      | RPC–2                             | –                            | –        | 22                     | 37                      |
|                                                                    |                      | Unclassified type Ia              | –                            | –        | –                      | 1                       |
|                                                                    | Type Ib              | FWs                               | 10                           | 7        | 15                     | 13                      |
|                                                                    |                      | JRC–3                             | 1                            | –        | 4                      | 1                       |
|                                                                    |                      | LWs                               | –                            | –        | 1                      | –                       |
|                                                                    |                      | <i>Methylocaldum</i>              | 40                           | 36       | 30                     | 22                      |
|                                                                    |                      | Methylocaldum–rel                 | 1                            | 2        | 6                      | 9                       |
|                                                                    |                      | RPC–1                             | 33                           | 15       | 104                    | 43                      |
|                                                                    |                      | RPCs                              | 87                           | 106      | 344                    | 240                     |
|                                                                    |                      | Deep sea 5                        | 1                            | –        | –                      | 1                       |
|                                                                    |                      | Unclassified type Ib              | 12                           | 4        | 21                     | 5                       |
| Type II                                                            | Type IIa             | <i>Methylocystis</i>              | 770                          | 490      | 1,184                  | 1,500                   |
|                                                                    |                      | <i>Methylosinus</i>               | 122                          | 78       | 75                     | 29                      |
|                                                                    |                      | <i>Methylosinus/Methylocystis</i> | 72                           | 68       | 47                     | 43                      |
|                                                                    |                      | Unclassified type IIa             | 35                           | 9        | 34                     | 18                      |
|                                                                    | Unclassified type II |                                   | –                            | –        | 1                      | –                       |
| <i>pxmA</i> –like                                                  | Crenothrix–like      | Crenothrix                        | 13                           | 3        | 2                      | –                       |
|                                                                    |                      | Crenothrix–rel                    | 268                          | 65       | 121                    | 33                      |
|                                                                    | RA21–like            | gp23                              | 2                            | 3        | 4                      | 1                       |
|                                                                    | TUSC–like            | TUSC                              | 19                           | 16       | 8                      | 7                       |
|                                                                    |                      | TUSC–rel                          | 1                            | –        | –                      | –                       |
| AOB–like                                                           |                      |                                   | 70                           | 54       | 41                     | 12                      |
| Not-assigned                                                       |                      |                                   | 4                            | 1        | 2                      | 1                       |
| No-hits                                                            |                      |                                   | –                            | –        | –                      | 1                       |
| Total                                                              |                      |                                   | 1,620                        | 1,011    | 2,383                  | 2,586                   |

a, LCA Parameters used in MEGAN is Min Support: 1, Min Score: 400, Top Percent: 5.0, Win Score: 50.0, Min Complexity: 0.0.

b, 1-Time flush-Feeding.

c, 10-Time flush-Feeding.

–, not determined.



**Supplementary Table 4. High-throughput sequencing of 16S rRNA genes and transcripts in paddy soils with and without HAMO (high-affinity methane oxidation) activity**

| Treatment                  | Replicate | Number of high quality 16S rRNA Reads |           | Type I methanotrophs (%) |      | Type II methanotrophs (%) |     |
|----------------------------|-----------|---------------------------------------|-----------|--------------------------|------|---------------------------|-----|
|                            |           | DNA                                   | RNA       | DNA                      | RNA  | DNA                       | RNA |
| Time zero                  | R1        | 43,413                                | 26,491    | 0.6                      | 1.3  | 0.3                       | 0.4 |
|                            | R2        | 71,311                                | 70,707    | 0.5                      | 1.8  | 0.3                       | 0.8 |
|                            | R3        | 21,252                                | 58,276    | 0.5                      | 1.8  | 0.3                       | 0.9 |
| Non-HAMO                   | R1        | 26,219                                | 109,479   | 0.6                      | 1.7  | 0.3                       | 1.3 |
|                            | R2        | 56,382                                | 4,470     | 0.5                      | 1.3  | 0.2                       | 1.0 |
|                            | R3        | 14,196                                | 25,331    | 0.6                      | 1.8  | 0.3                       | 0.6 |
| 1-TF <sup>a</sup><br>HAMO  | R1        | 47,873                                | 90,741    | 6.9                      | 17.0 | 0.7                       | 2.2 |
|                            | R2        | 13,436                                | 82,442    | 3.5                      | 17.1 | 0.4                       | 2.0 |
|                            | R3        | 22,330                                | 53,078    | 3.9                      | 16.5 | 0.4                       | 1.3 |
| 1-TF<br>HAMO-lost          | R1        | 45,843                                | 53,416    | 2.1                      | 9.5  | 0.4                       | 1.3 |
|                            | R2        | 115,066                               | 66,645    | 2.3                      | 9.5  | 0.4                       | 1.2 |
|                            | R3        | 93,542                                | 59,258    | 2.0                      | 8.0  | 0.5                       | 1.6 |
| 1-TF<br>HAMO-regained      | R1        | 39,175                                | 76,952    | 4.3                      | 17.7 | 0.7                       | 2.3 |
|                            | R2        | 35,977                                | 98,852    | 3.7                      | 20.4 | 0.6                       | 2.0 |
|                            | R3        | 45,607                                | 89,379    | 5.3                      | 23.7 | 0.7                       | 2.1 |
| 10-TF <sup>b</sup><br>HAMO | R1        | 64,339                                | 74,498    | 8.7                      | 13.4 | 1.2                       | 3.8 |
|                            | R2        | 20,833                                | 79,897    | 10.2                     | 11.3 | 0.8                       | 3.6 |
|                            | R3        | 241,103                               | 45,502    | 6.6                      | 12.9 | 1.3                       | 2.8 |
| 10-TF<br>HAMO-lost         | R1        | 145,226                               | 111,278   | 5.3                      | 18.3 | 0.7                       | 1.8 |
|                            | R2        | 24,360                                | 72,854    | 4.7                      | 15.3 | 0.7                       | 2.8 |
|                            | R3        | –                                     | 63,090    | –                        | 14.6 | –                         | 2.1 |
| Average                    |           | 59,374                                | 67,268    |                          |      |                           |     |
| Total                      |           | 1,187,483                             | 1,412,636 |                          |      |                           |     |

a, 1-Time flush-Feeding; b, 10-Time flush-Feeding; –, not determined.

**Supplementary Table 5. MiSeq sequencing summary of 16S rRNA genes in the fractionated DNA isolated from SIP microcosms of paddy soil**

| DNA Fraction | High Quality Read Number               |                                        | Type I methanotrophs (%)               |                                        | Type II methanotrophs (%)              |                                        |
|--------------|----------------------------------------|----------------------------------------|----------------------------------------|----------------------------------------|----------------------------------------|----------------------------------------|
|              | <sup>12</sup> CH <sub>4</sub> -control | <sup>13</sup> CH <sub>4</sub> -labeled | <sup>12</sup> CH <sub>4</sub> -control | <sup>13</sup> CH <sub>4</sub> -labeled | <sup>12</sup> CH <sub>4</sub> -control | <sup>13</sup> CH <sub>4</sub> -labeled |
| 14           | 1                                      | –                                      | –                                      | –                                      | –                                      | –                                      |
| 13           | 28,020                                 | 734                                    | 7.8335                                 | –                                      | 0.5284                                 | –                                      |
| 12           | 71                                     | 1                                      | –                                      | –                                      | –                                      | –                                      |
| 11           | 90,131                                 | 130,485                                | 4.617                                  | 0.584                                  | 1.4758                                 | 0.141                                  |
| 10           | 78519                                  | 38,532                                 | 14.8006                                | 0.4775                                 | 0.6701                                 | 0.2621                                 |
| 9            | 122,654                                | 76,217                                 | 1.6549                                 | 0.8857                                 | 0.4692                                 | 0.6504                                 |
| 8            | 25,209                                 | 106,827                                | 1.8367                                 | 0.7313                                 | 0.5316                                 | 0.6058                                 |
| 7            | 106,346                                | 41,508                                 | 1.7399                                 | 3.4028                                 | 0.948                                  | 0.9061                                 |
| 6            | 14,084                                 | 18,468                                 | 1.2354                                 | 56.7468                                | 0.3834                                 | 4.0556                                 |
| 5            | 28                                     | 72                                     | –                                      | –                                      | –                                      | –                                      |
| 4            | 8,432                                  | 9,016                                  | 1.2935                                 | 0.8984                                 | 0.3322                                 | 9.6939                                 |
| 3            | 4,271                                  | 21,260                                 | 1.3349                                 | 0.9221                                 | 1.1943                                 | 3.7967                                 |
| 2            | 176,983                                | 208,434                                | 2.1025                                 | 1.7489                                 | 0.1582                                 | 1.878                                  |
| 1            | 9,748                                  | 7,886                                  | 1.303                                  | 0.6596                                 | 0.2052                                 | 0.5328                                 |
| Total        | 664,497                                | 659,440                                |                                        |                                        |                                        |                                        |

–, not determined or not used in further analysis.

**Supplementary Table 6. Glycogen metabolism-related gene transcripts detected in HAMO (high-affinity methane oxidation) and non-HAMO soils.** Subsystem in MG-RAST (Meta Genome Rapid Annotation using Subsystem Technology) was used for gene function annotation (average e-value  $\leq -10$ , average align length  $\geq 30$  aa, average % identity  $\geq 60$ ). The transcript abundance was normalized based on reads number per million function-known transcripts

| Subsystem levels |                 |                     |                                                                        | Abundance |          |
|------------------|-----------------|---------------------|------------------------------------------------------------------------|-----------|----------|
| level 1          | level 2         | level 3             | function                                                               | HAMO      | Non-HAMO |
| Carbohydrates    | Polysaccharides | Glycogen metabolism | Glycogen phosphorylase (EC 2.4.1.1)                                    | 73        | 42       |
| Carbohydrates    | Polysaccharides | Glycogen metabolism | Glucose-1-phosphate adenylyltransferase (EC 2.7.7.27)                  | 67        | 19       |
| Carbohydrates    | Polysaccharides | Glycogen metabolism | 1,4-alpha-glucan (glycogen) branching enzyme, GH-13-type (EC 2.4.1.18) | 52        | 23       |
| Carbohydrates    | Polysaccharides | Glycogen metabolism | Glycogen synthase, ADP-glucose transglucosylase (EC 2.4.1.21)          | 38        | 18       |
| Carbohydrates    | Polysaccharides | Glycogen metabolism | Glycogen debranching enzyme (EC 3.2.1.-)                               | 14        | 11       |
| Carbohydrates    | Polysaccharides | Glycogen metabolism | 4-alpha-glucanotransferase (amylomaltase) (EC 2.4.1.25)                | 0         | 1        |
